# 1 **X chromosomes show a faster evolutionary rate and** 2 **complete somatic dosage compensation across *Timema*** 3 **stick insect species**

4  
5 Darren J. Parker<sup>1,2</sup>, Kamil S. Jaron<sup>1,2,3</sup>, Zoé Dumas<sup>1</sup>, Marc Robinson-Rechavi<sup>1,2</sup>, and Tanja  
6 Schwander<sup>1</sup>

7  
8 1. Department of Ecology and Evolution, University of Lausanne, Lausanne, Switzerland

9 2. Swiss Institute of Bioinformatics, Lausanne, Switzerland

10 3. Institute of Evolutionary Biology, School of Biological Sciences, University of Edinburgh, Edinburgh,  
11 EH9 3FL

12  
13 Correspondence should be addressed to [DarrenJames.Parker@unil.ch](mailto:DarrenJames.Parker@unil.ch) or  
14 [Tanja.Schwander@unil.ch](mailto:Tanja.Schwander@unil.ch)  
15

## 16 **Abstract**

17  
18 Sex chromosomes have evolved repeatedly across the tree of life. As they are present in  
19 different copy numbers in males and females, they are expected to experience different  
20 selection pressures than the autosomes, with consequences including a faster rate of  
21 evolution, increased accumulation of sexually antagonistic alleles, and the evolution of dosage  
22 compensation. Whether these consequences are general or linked to idiosyncrasies of  
23 specific taxa is not clear as relatively few taxa have been studied thus far. Here we use whole-  
24 genome sequencing to identify and characterize the evolution of the X chromosome in five  
25 species of *Timema* stick insects with XX:X0 sex determination. The X chromosome had a  
26 similar size (approximately 11% of the genome) and gene content across all five species,  
27 suggesting that the X chromosome originated prior to the diversification of the genus. Genes  
28 on the X showed evidence of a faster evolutionary rate than genes on the autosomes, likely  
29 due to less effective purifying selection. Genes on the X also showed almost complete dosage  
30 compensation in somatic tissues (heads and legs), but dosage compensation was absent in  
31 the reproductive tracts. Contrary to prediction, sex-biased genes showed little enrichment on  
32 the X, suggesting that the advantage X-linkage provides to the accumulation of sexually  
33 antagonistic alleles is weak. Overall, we found the consequences of X-linkage on gene  
34 sequences and expression to be similar across *Timema* species, showing the characteristics  
35 of the X chromosome are surprisingly consistent over 30 million years of evolution.

36

## 37 Introduction

38

39 One of the most common forms of genomic variation between individuals within species stems  
40 from sex chromosomes. Sex chromosomes differ in copy number between males and females,  
41 which has a large effect on the evolutionary forces acting on genes located on them.  
42 Specifically, when males are the heterogametic sex (i.e., in XY or X0 systems), the genes on  
43 the X chromosome are present in only a single copy in males, while genes on the autosomes  
44 are present in two copies. This fundamental difference is expected to have a large effect on  
45 the evolutionary forces acting on genes located on the X chromosome, with consequences  
46 including a faster rate of sequence evolution, increased accumulation of sexually antagonistic  
47 alleles, and the evolution of dosage compensation mechanisms (Bachtrog et al. 2011; Wright  
48 et al. 2016; Lenormand and Roze 2021). Such effects should apply across taxa, meaning we  
49 should observe common patterns of X chromosome evolution in diverse species. Despite this,  
50 studies of sex chromosome evolution have shown a great deal of variation among study  
51 systems, including differences in the influence selection and drift have on the content of the X  
52 and in the extent of dosage compensation (Bachtrog et al. 2011; Gu and Walters 2017).  
53 Currently, it is difficult to understand the factors that govern this variation as only few taxa  
54 (typically with only a single or few representative species) have been studied. To elucidate  
55 these factors, studies of X chromosome evolution are thus needed from multiple species from  
56 a wide range of taxa (Palmer et al. 2019). Such studies will allow us to disentangling general  
57 sex chromosome-linked patterns from species-specific patterns, and allow us to develop a  
58 fuller understanding of sex chromosome evolution.

59

60 The rate of sequence evolution is expected to differ between the X chromosome and  
61 autosomes for two main reasons. Firstly, the X is hemizygous in males, meaning that  
62 recessive or partially recessive mutations in X-linked genes will be more exposed to selection  
63 than mutations in genes on the autosomes, allowing for beneficial mutations to be fixed and  
64 deleterious mutations to be purged more effectively (Charlesworth et al. 1987). On the other  
65 hand, as the X is only present in a single copy in males, its effective population size is expected  
66 to be smaller than that of the autosomes. This means that the effects of drift will also be  
67 stronger for genes on the X chromosome than on the autosomes, which will tend to reduce  
68 the fixation rate for advantageous mutations but increase it for deleterious mutations (Wright  
69 1931; Vicoso and Charlesworth 2009). Together, these effects have been used as an  
70 explanation for the overall faster evolution of the X chromosome (the faster-X effect) seen in  
71 many species (Mank et al. 2010; Meisel and Connallon 2013; Parsch and Ellegren 2013;  
72 Charlesworth et al. 2018). In addition, the difference in X chromosome copy number between  
73 males and females is expected to facilitate the fixation of sexually antagonistic alleles (Rice  
74 1984; Gibson et al. 2002; Mullon et al. 2012). This is because the X chromosome spends two-  
75 thirds of its time in females, giving an advantage to dominant female-beneficial alleles on the  
76 X. In addition, recessive alleles on the X will be exposed to selection on the X in males, giving  
77 an advantage to male-beneficial alleles. These complex forces have the potential to shape  
78 how sexually antagonistic variation is distributed across the genome, which can in turn  
79 influence broad evolutionary processes such as speciation (Coyne and Orr 2004; Payseur et  
80 al. 2018) and sexual conflict (Bachtrog et al. 2011; Mank et al. 2014; Wilkinson et al. 2015).

81

82 The fact that genes on the X are present in different copy numbers in males and females can  
83 also create a problem for gene expression, as for many genes expression is proportional to  
84 their copy number (Birchler and Veitia 2012; Birchler 2016). As such, species with  
85 differentiated sex chromosomes should have evolved dosage compensation mechanisms to  
86 equalise expression of the X chromosome in males and females (Ohno 1967; Charlesworth  
87 1978; Charlesworth 1996). Note that such dosage compensation mechanisms can evolve  
88 either in response to sex chromosomes differentiation or alongside it (Lenormand et al. 2020).  
89 Dosage compensation has been demonstrated across a wide range of taxa (Disteche 2012;  
90 Mank 2013; Gu and Walters 2017), including model species such as *Drosophila melanogaster*  
91 (Conrad and Akhtar 2012) and *Caenorhabditis elegans* (Meyer 2000) where this phenomenon  
92 has been studied in detail (Parkhurst and Meneely 1994; Lucchesi 1998; Meyer 2000; Straub  
93 and Becker 2011; Conrad and Akhtar 2012). Despite this commonality, it has become  
94 increasingly clear that the extent to which genes on the X are dosage compensated varies  
95 among species. Several studied species show only partial or no dosage compensation (Mank  
96 2013). The extent of dosage compensation may also differ by tissue type, with reduced dosage  
97 compensation observed in the reproductive tracts of e.g. *C. elegans* (Kelly et al. 2002; Pirrotta  
98 2002) or *D. melanogaster* (Oliver 2002; Meiklejohn et al. 2011; Mahadevaraju et al. 2021).  
99 However, it is not clear how widespread tissue-specific dosage compensation is, as work in  
100 non-model species often use whole-body samples for examining expression (Gu and Walters  
101 2017).

102

103 Here we expand our knowledge of the evolutionary characteristics of sex chromosomes by  
104 identifying and studying the X chromosome in *Timema* stick insects. Aspects of X  
105 chromosome evolution have been previously studied in several insect orders (Odonata  
106 (Chauhan et al. 2021), Hemiptera (Pal and Vicoso 2015; Richard et al. 2017), Orthoptera  
107 (Rayner et al. 2021), Strepsiptera (Mahajan and Bachtrog 2015), Coleoptera (Prince et al.  
108 2010; Mahajan and Bachtrog 2015), and Diptera (Bone and Kuroda 1996; Marin et al. 1996;  
109 Deng et al. 2011; Nozawa et al. 2014; Jiang et al. 2015; Vicoso and Bachtrog 2015; Rose et  
110 al. 2016)). However, to date no studies have examined X chromosome evolution in stick  
111 insects (Phasmatodea), an order which originated approximately 130 mya (Simon et al. 2019)  
112 and contains around 3100 extant species (Bradler and Buckley 2018). First, we identified the  
113 X chromosome in five species of *Timema* that diverged approximately 30 mya (Riesch et al.  
114 2017). *Timema* have an XX/X0 sex determination system (Schwander and Crespi 2009). To  
115 determine if genes on the X chromosome show the predicted faster rate of sequence evolution  
116 than genes on the autosomes, we examined sequence evolution rates in each species. In  
117 addition, we tested if the X chromosome is enriched for sexually antagonistic alleles. This was  
118 done by examining if genes with sex-biased expression are enriched on the X chromosome,  
119 as the evolution of sex-biased expression is thought to be driven primarily by sexually  
120 antagonistic selection (Ellegren and Parsch 2007; Innocenti and Morrow 2010; Griffin et al.  
121 2013). Finally, we examined if the genes on the X chromosome are dosage compensated by  
122 comparing male and female gene expression in three composite tissues (heads, legs, and  
123 reproductive tracts). Our study thus provides a detailed study of several key aspects of X  
124 chromosome evolution in a previously unstudied group, revealing that the characteristics of  
125 these X chromosomes are conserved over at least 30 million years of evolution.

## 126 Results

### 127 Identifying X-linked scaffolds

128 We used a coverage approach to identify X-linked scaffolds in our previous genome  
129 assemblies (Jaron et al. 2021). Genomic reads from four males and five females from each  
130 species were mapped onto the corresponding reference genome. After filtering low-quality  
131 alignments and non-uniquely mapping reads (see Methods) the median coverage per sample  
132 ranged from 11x to 31x (18.5x on average, see [Table S1](#)). Visual inspection of coverage  
133 distributions ([Figs S1-S5](#)) found that while most libraries had either one (in females) or two (in  
134 males) coverage peaks, three libraries (*T. podura* (H56, [Fig. S4](#)), *T. poppensis* (ReSeq Ps08  
135 and Reseq\_Ps12, [Fig. S5](#))) did not show a clear coverage peak, and were excluded from all  
136 further analyses.

137  
138 To identify X-linked scaffolds, we used the  $\log_2$  ratio of (normalised) coverage of males to  
139 females. As males have only a single copy of the X and females have two, X linked scaffolds  
140 should have twice as much coverage in females as males ( $\log_2$  male:female coverage  $\approx -1$ ).  
141 Autosomes are expected to have the same coverage in both sexes ( $\log_2$  male:female  
142 coverage  $\approx 0$ ). Considering all scaffolds with a  $\log_2$  ratio of male to female coverage  $<$   
143 autosomal peak  $-0.5$  to be X-linked, we classified between 12 and 14 % of each genome as  
144 X-linked ([Table 1](#), [Fig. S6](#)), which fits well with the X chromosome size observed in karyotypes  
145 (Schwander and Crespi 2009). This approach may mean some autosomal contigs may be  
146 misclassified as X-linked, thus we also repeated all our analyses with a more stringent  
147 classification scheme (scaffolds with a  $\log_2$  ratio of male to female coverage within 0.1 of the  
148 X linked peak) ([Table S2](#), [Fig. S6](#)). Using the more stringent classification scheme produced  
149 very similar results (not shown). Of note, most differences between the classification schemes  
150 are for short scaffolds (1000-4999 bp), which represent  $\sim 20\%$  of the genome assemblies.  
151 When these are excluded the two classification schemes classify almost the same set of  
152 scaffolds as X-linked ([Fig. S7](#), [Table S3](#)). Finally, we also examined the heterozygosity of the  
153 X in males. As expected, the heterozygosity of the X is close to zero and much lower than on  
154 the autosomes, corroborating our X-linked scaffold assignments ([Fig. S8](#)).

155

156 **Table 1 | Number of genes and scaffolds classified as X-linked or autosomal**

| Species                | Min scaffold length | % genome X-linked | N Autosomal genes | N X-linked genes | N genes not classified |
|------------------------|---------------------|-------------------|-------------------|------------------|------------------------|
| <i>T. bartmani</i>     | 1000                | 12.11             | 12804             | 1244             | 18                     |
| <i>T. cristinae</i>    | 1000                | 12.21             | 12542             | 1316             | 24                     |
| <i>T. californicum</i> | 1000                | 12.22             | 13207             | 1344             | 12                     |
| <i>T. podura</i>       | 1000                | 13.75             | 15069             | 1457             | 3                      |
| <i>T. poppensis</i>    | 1000                | 12.40             | 14115             | 1454             | 36                     |

### 157 The X chromosome is conserved across *Timema*

158 Comparing orthologs across the five different species shows X chromosome gene content is  
159 conserved, with  $>90\%$  of X-linked orthologs shared between the 5 species ([Fig. 1](#), [Fig S9](#)).  
160 This overlap is much greater than expected by chance ( $FDR < 6.863 \times 10^{-316}$ ). This suggests  
161 that the X chromosome is homologous in all five species, which last shared a common  
162 ancestor approximately 30 million years ago (Riesch et al. 2017). Additionally, we used

163 species genome alignments to an independent *T. cristinae* genome assembly (Nosil et al.  
 164 2018) to assign scaffolds to linkage groups based on a single reference. By applying coverage  
 165 analyses we were able to identify and correct the X linked scaffolds in the Nosil et al. 2018  
 166 assembly (see Methods). Using this corrected reference, we found that contigs aligned to X-  
 167 linked scaffolds showed reduced coverage in males but not females in each species (Figs  
 168 S10-S14), again indicating the X chromosome is the same in all species. Finally, using BLAST  
 169 we found that the majority (72%) of the shared X-linked genes in *Timema* (for which we were  
 170 able to obtain a significant hit) were also present on the X chromosome of *Bacillus rossius*  
 171 (Fig. S15). The split between *Timema* and all other extant phasmids (the Euphasmatodea,  
 172 which includes *Bacillus*) occurred approximately 120 mya (Simon et al. 2019), suggesting that  
 173 the X chromosome in phasmids predates this split.

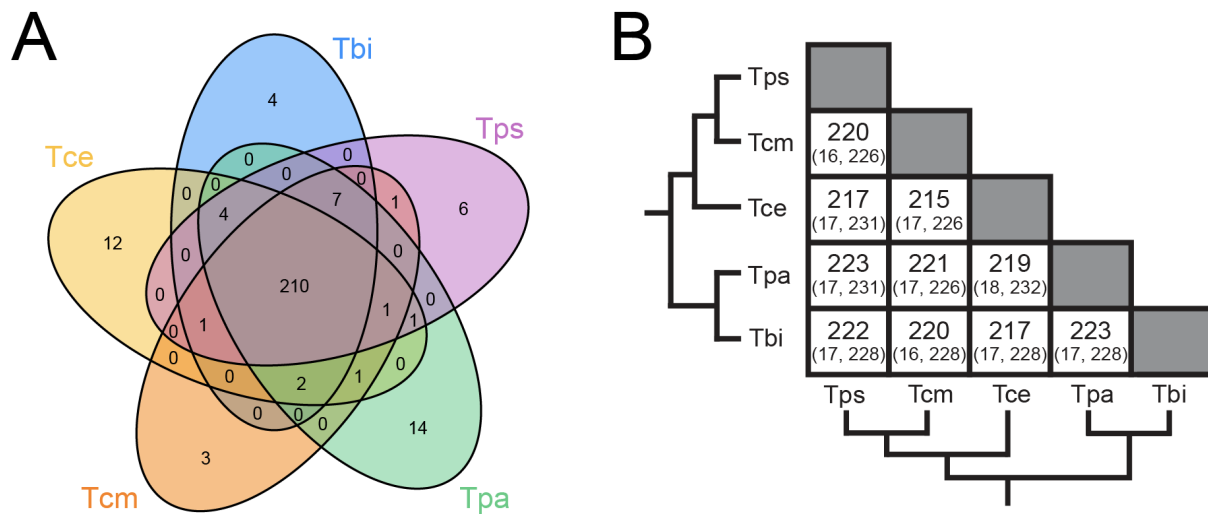

174 **Fig. 1 | The X chromosome is conserved between *Timema* species.** **A.** Venn-diagrams  
 175 showing the number of shared X-linked orthologs between species. **B.** Number of shared  
 176 orthologs (expected, maximum possible). The observed amount of overlap was much greater  
 177 than expected in all comparisons ( $FDR < 6.863 \times 10^{-316}$ ). Species names are abbreviated as  
 178 Tbi = *T. bartmani*, Tce = *T. cristinae*, Tcm = *T. californicum*, Tps = *T. poppensis*, and Tpa = *T.*  
 179 *podura*.  
 180

181

## 182 The X chromosome has reduced genetic variation

183

184 We used female samples to examine two related measures of genetic variation:  
 185 heterozygosity and nucleotide diversity ( $\pi$ ). Only female samples were used, as males are  
 186 hemizygous for the X, which would affect the estimation of heterozygosity on the X directly. It  
 187 would also affect the estimation of nucleotide diversity indirectly, as X haplotypes containing  
 188 recessive lethals on the X will be absent in male samples. We found that both heterozygosity  
 189 and nucleotide diversity ( $\pi$ ) were lower on X-linked than on autosomal scaffolds (Fig. S8, S16),  
 190 as expected. In all species, the ratios of X to autosomes for both of these measures  
 191 (heterozygosity = 0.16 to 0.62 (Fig. 2),  $\pi$  = 0.19 to 0.48 (Fig. 2)) were lower than the 0.75 that  
 192 would be expected from the reduced effective population size of the X relative to the  
 193 autosomes. This pattern was also seen when comparing the X to each of the autosomal  
 194 linkage groups individually (Fig. S17, S18). Nucleotide diversity estimates were then used to

195 estimate the effective population size of each species. From this, we estimated the autosomal  
 196 effective population size in *Timema* to range from ~150,000 (*T. poppensis*) to ~2,000,000 (*T.*  
 197 *podura*) (Table S4).

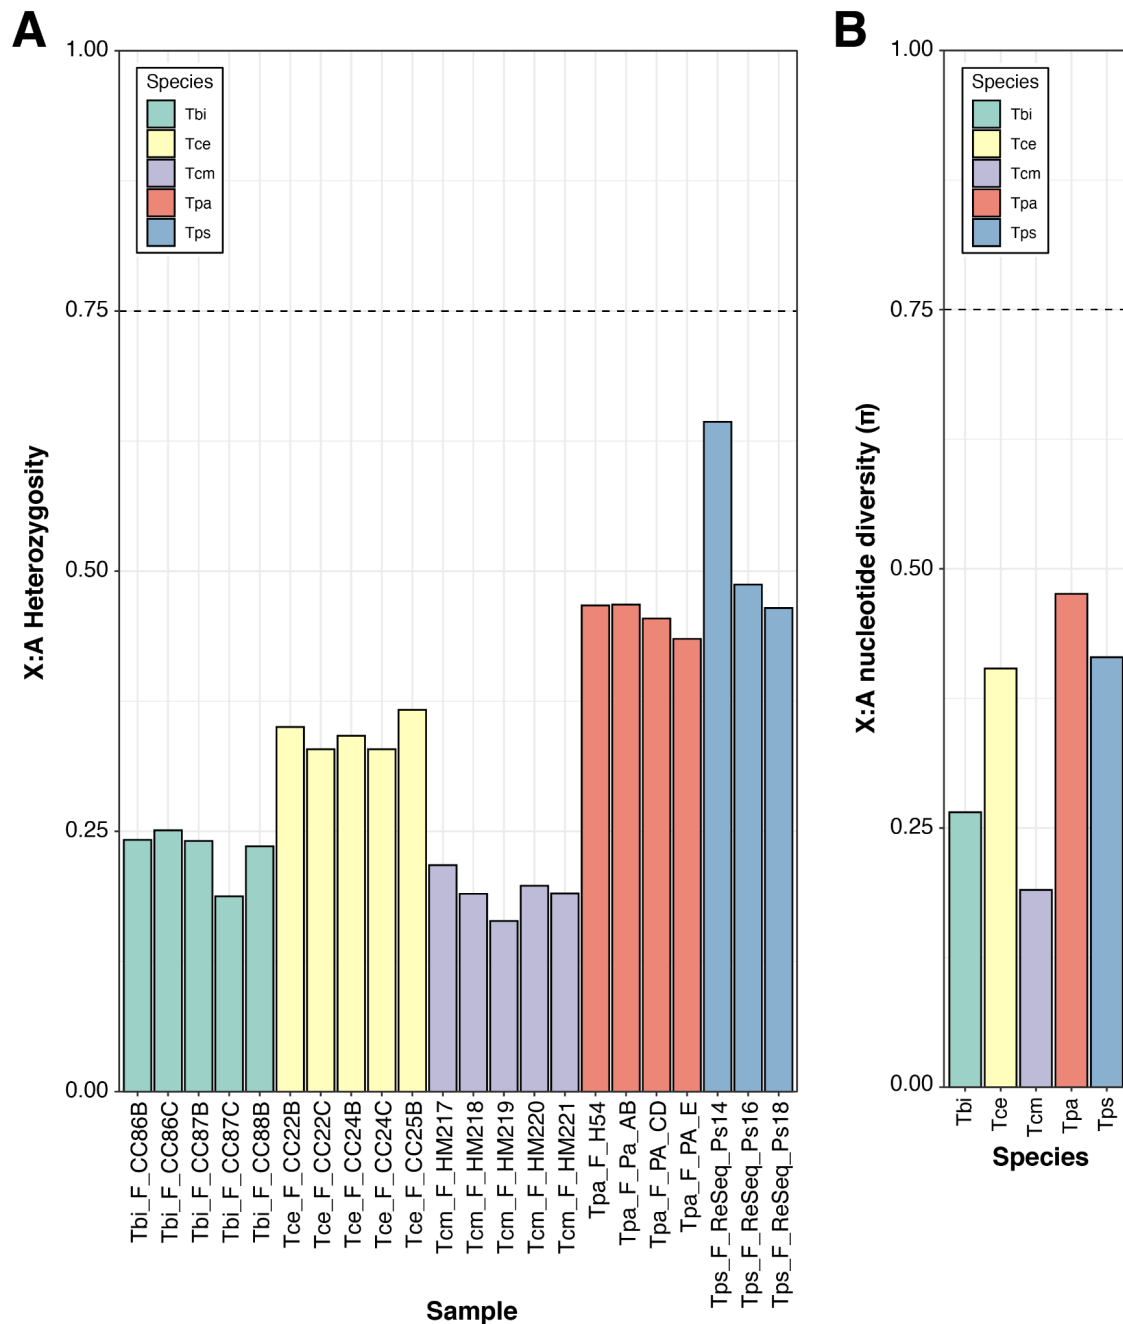

198 **Fig. 2 | Genetic variation on the X chromosome is lower than expected.** **A.** Ratio of  
 199 heterozygosity on the X and autosomes in 3 to 5 females per species. **B.** Ratio of pairwise  
 200 nucleotide diversity ( $\pi$ ) on the X and autosomes. Species names are abbreviated as Tbi = *T.*  
 201 *bartmani*, Tce = *T. cristinae*, Tcm = *T. californicum*, Tps = *T. poppensis*, and Tpa = *T. podura*.  
 202 The dotted lines indicate the neutral expectation in a population with a balanced sex ratio.  
 203

204

205

206

207 **The X chromosome shows evidence for reduced purifying selection but no**  
208 **differences in positive selection**

209 The X chromosome shows a faster rate of sequence divergence than the autosomes as shown  
210 by an elevated dN/dS for X-linked genes (Fig. 3A). This increased rate appears to be driven  
211 by reduced purifying selection, as X-linked genes are not enriched for positively selected  
212 genes (Fig. 3B).

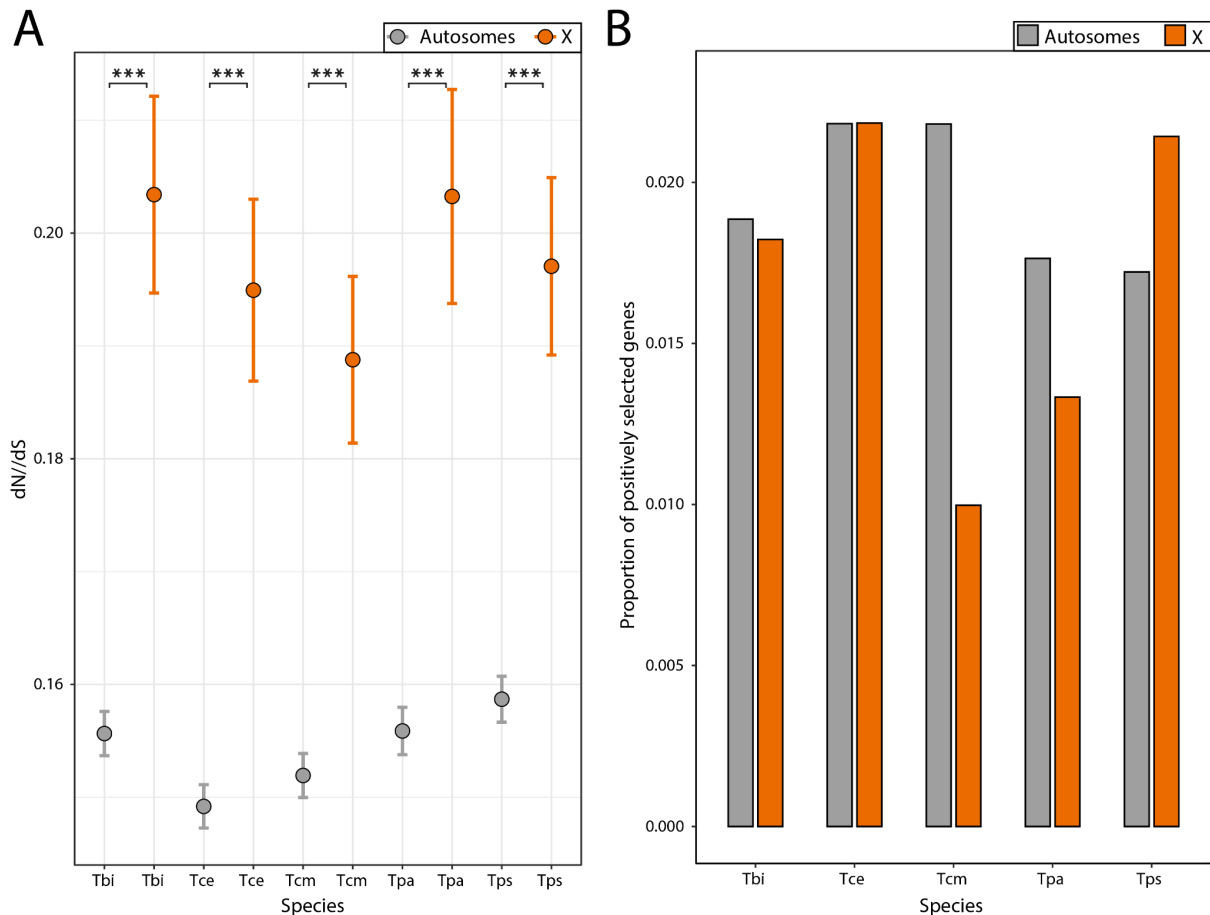

213 **Fig. 3 | Sequence evolution on the X and autosomes. A.** Average dN/dS across genes.  
214 Error bars indicate standard error. **B.** Proportion of positively selected genes. Positively  
215 selected genes were not enriched on the X chromosome (Fisher's exact test p value = 0.50).  
216 Species names are abbreviated as Tbi = *T. bartmani*, Tce = *T. cristinae*, Tcm = *T. californicum*,  
217 Tps = *T. poppensis*, and Tpa = *T. podura*.  
218

219

220 ***Timema* show complete dosage compensation in heads and legs, but no dosage**  
221 **compensation in reproductive tracts**

222 We examined if the X chromosome is dosage compensated in *Timema* by comparing gene  
223 expression in males and females in three different composite tissues (heads, legs, and  
224 reproductive tracts) for each of our five species. While for the main analysis we calculated  
225 expression values as FPKM, we also repeated our analyses using TPM. Analyses based on  
226 TPM showed very similar results and are provided as supplemental figures and tables. We  
227 examined the log<sub>2</sub> ratio of male to female expression on the X and the autosomes. For the  
228

229 autosomes and a dosage compensated X, the  $\log_2$  value should be approximately 0, whereas  
230 a non-dosage compensated X would have a value of approximately -1. We found that in heads  
231 and legs the ratio was close to 0 with only small differences between the X and the autosomes  
232 (Figs. 4, S19, S20), indicating almost-complete complete dosage compensation in these  
233 tissues. By contrast, in the reproductive tracts the ratio of male to female expression for genes  
234 on the X is close to -1 (Figs. 4, S19, S20), indicating an absence of dosage compensation in  
235 this tissue. This observation was also seen when comparing the X to each of the autosomal  
236 linkage groups individually (Figs. S21-S22). An alternative, mutually non-exclusive possibility  
237 is that the greatly reduced expression observed in genes on the X in male reproductive tracts  
238 is due to a large enrichment of female-biased genes and depletion of male-biased genes.  
239 Although we cannot formally exclude this possibility, three lines of evidence indicate that lack  
240 of dosage compensation in reproductive tracts is the best explanation for our findings. Firstly,  
241 a lack of dosage compensation is expected to result in a two-fold reduction of expression,  
242 meaning X linked genes in males should show a major peak with a two-fold reduction in  
243 expression (Mank and Ellegren 2009; Vicoso et al. 2013; Pal and Vicoso 2015), which is what  
244 we observe (Fig. 5). Secondly, if the X chromosome facilitates the accumulation of sex-  
245 biased genes, we should be able to observe this effect in all tissues (Jaquiéry et al. 2021).  
246 While we find a large enrichment of female-biased genes and a depletion of male-biased  
247 genes on the X in the reproductive tracts, this is not found in the other tissues, with only a  
248 slight enrichment of female-biased genes in the heads of two species and a depletion of male-  
249 biased genes in one species (Fig. 6, Fig. S23, Table S5, Table S6). This suggests that  
250 selection for the enrichment of female-biased genes and the depletion of male-biased genes  
251 on the X is weak, and thus unlikely to generate the large effect sizes we see in the reproductive  
252 tracts. Finally, a reduction in expression of the male X due to a lack of dosage compensation  
253 is expected to be consistent across species, since they share the same X chromosome (see  
254 above). By contrast, sex biased expression independently of dosage is more likely to be  
255 species-specific given the very fast turnover of sex biased genes observed between closely  
256 related species in several taxa (Zhang et al. 2007; Harrison et al. 2015) including *Timema*  
257 (Parker et al. 2019a). To distinguish between these patterns, we tested if sex-biased genes  
258 on the X in the reproductive tracts are underrepresented for genes with species by sex  
259 interactions. We found that genes on the X are underrepresented for genes showing species  
260 by sex interactions in the reproductive tracts ( $p = 0.010$ ), and that this is not the case for the  
261 heads ( $p = 0.938$ ) or legs ( $p = 0.795$ ). This shows that sex-differences in expression on the X  
262 are more consistent between species in the reproductive tracts than in the heads and legs  
263 (also see Fig. S24), and further supports a lack of dosage compensation in the reproductive  
264 tracts rather than a large enrichment of female-biased genes on the X.  
265



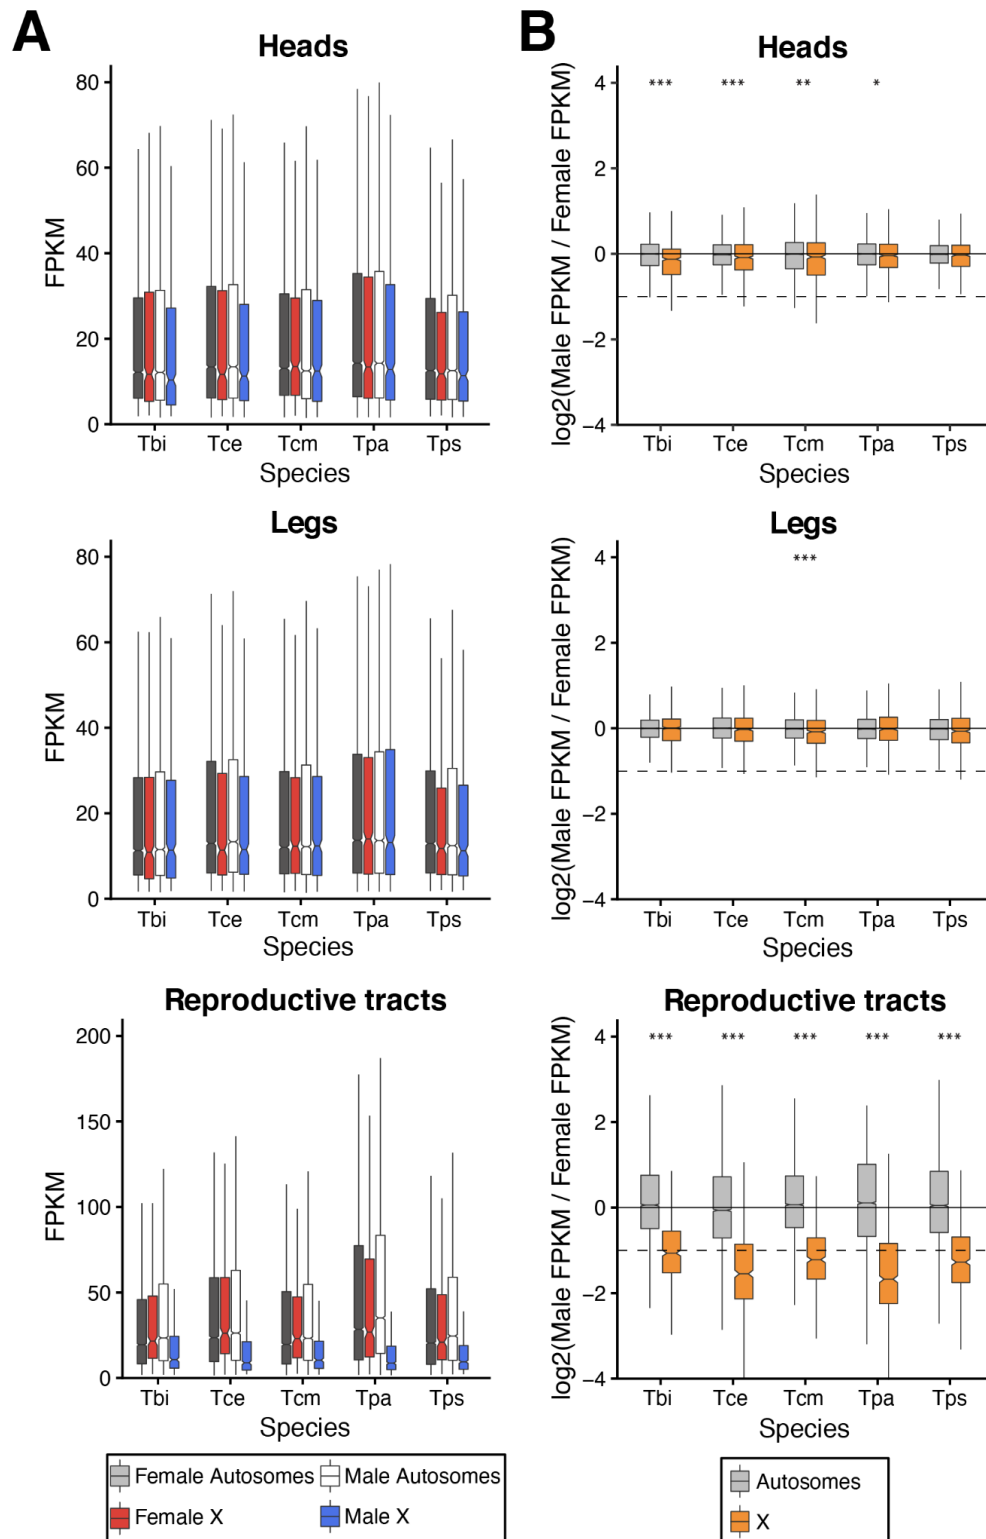

266  
 267  
 268  
 269  
 270  
 271  
 272  
 273

**Fig. 4 | Gene expression on the X and autosomes in heads, legs, and reproductive tracts. A.** Average expression levels in males and females on the X and autosomes **B.** Log<sub>2</sub> of male to female expression ratio for the X and autosomes. Dashed lines represent a two-fold reduction in expression in males (as expected if there was no dosage compensation). Species names are abbreviated as Tbi = *T. bartmani*, Tce = *T. cristinae*, Tcm = *T. californicum*, Tps = *T. poppensis*, and Tpa = *T. podura*.

274 By examining the expression of the X and autosomes in the different tissues, we can infer the  
275 type of dosage compensation. In the dosage compensated tissues (heads and legs) genes on  
276 the autosomes and X have similar overall expression levels in both males and females, and  
277 the overall expression of the X is similar to that of the autosomes (Fig 4, Fig S19, Table S7).  
278 By contrast, in the reproductive tracts, where dosage compensation is lacking, expression of  
279 genes on the X is much lower in males than in females. This difference seems to be driven by  
280 changes in male expression, as X-linked gene expression in females remains similar to the  
281 autosomes (Fig 4, Fig S19, Table S7). This supports a mechanism of dosage compensation  
282 by hyper-transcription of the X in males, a mechanism common among other insects (Gu and  
283 Walters 2017).

284

285 Although we find almost complete dosage compensation, it is possible that its extent could  
286 vary along the X chromosome (Mullon et al. 2015). To address this, we examined the extent  
287 of dosage along the longest X-linked scaffolds in the genome, and found no evidence of  
288 variation along the X chromosome (Fig. S25 - S29, see also Fig. S30 - S41 for expression  
289 variation along the autosomes).

290

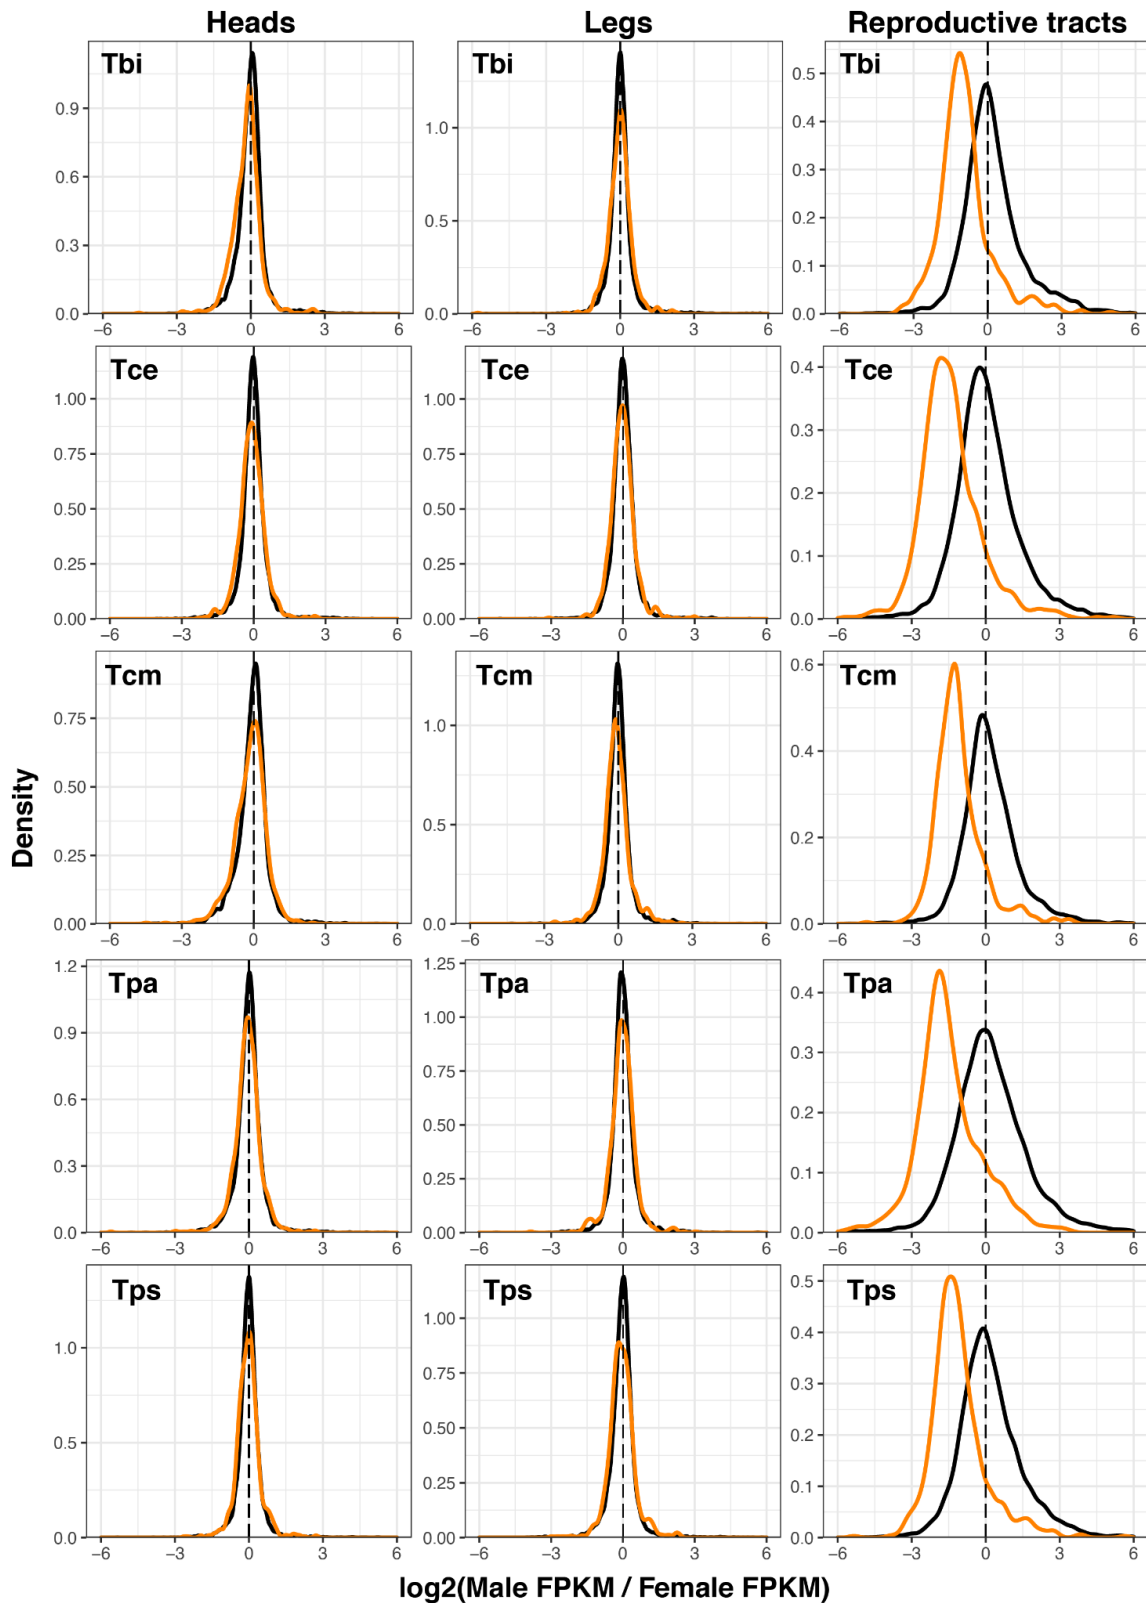

291  
292  
293  
294  
295  
296

**Fig. 5 | Ratio of male and female gene expression on the X (orange) and autosomes (black) in heads, legs, and reproductive tracts. Species names are abbreviated as Tbi = *T. bartmani*, Tce = *T. cristinae*, Tcm = *T. californicum*, Tps = *T. poppensis*, and Tpa = *T. podura*.**

297 **Sex-biased genes are not enriched on the X chromosome**

298

299 Sexually antagonistic mutations are expected to fix more easily on the X chromosome than  
300 the autosomes. As the evolution of sex-biased gene expression is thought to be primarily  
301 driven by sexually antagonistic selection, it is expected that the X chromosome will be a  
302 hotspot for sex-biased gene expression (Rice 1984; Gibson et al. 2002; Ellegren and Parsch  
303 2007; Innocenti and Morrow 2010; Griffin et al. 2013). Contrary to this expectation, we find  
304 most sex-biased genes on the autosomes (% of sex-biased genes on the X ranges from 8.3 -  
305 14.3, [Table S5](#)), and we find little evidence for enrichment of sex-biased genes on the X in the  
306 head and leg tissues ([Fig. 6](#), [Table S5](#), [Table S6](#)). Note that almost all genes on the X appear  
307 to be sex-biased in the reproductive tracts, but this effect is largely due to a lack of dosage  
308 compensation in this tissue (see above). In addition, while we do find an enrichment of female-  
309 biased genes in the heads of two species (*T. bartmani* and *T. podura*, [Fig. 6](#)) and a depletion  
310 of male-biased genes in *T. bartmani*, the effect sizes are small and the effect becomes  
311 insignificant when considering only sex-biased genes with at least a twofold difference in  
312 expression between males and females ([Fig. S23](#)). These findings suggest that the selective  
313 pressures to accumulate female-biased genes and reduce male-biased genes on the X are  
314 weak and/or that there are constraints to the gene content or expression levels on the *Timema*  
315 X chromosome.

316

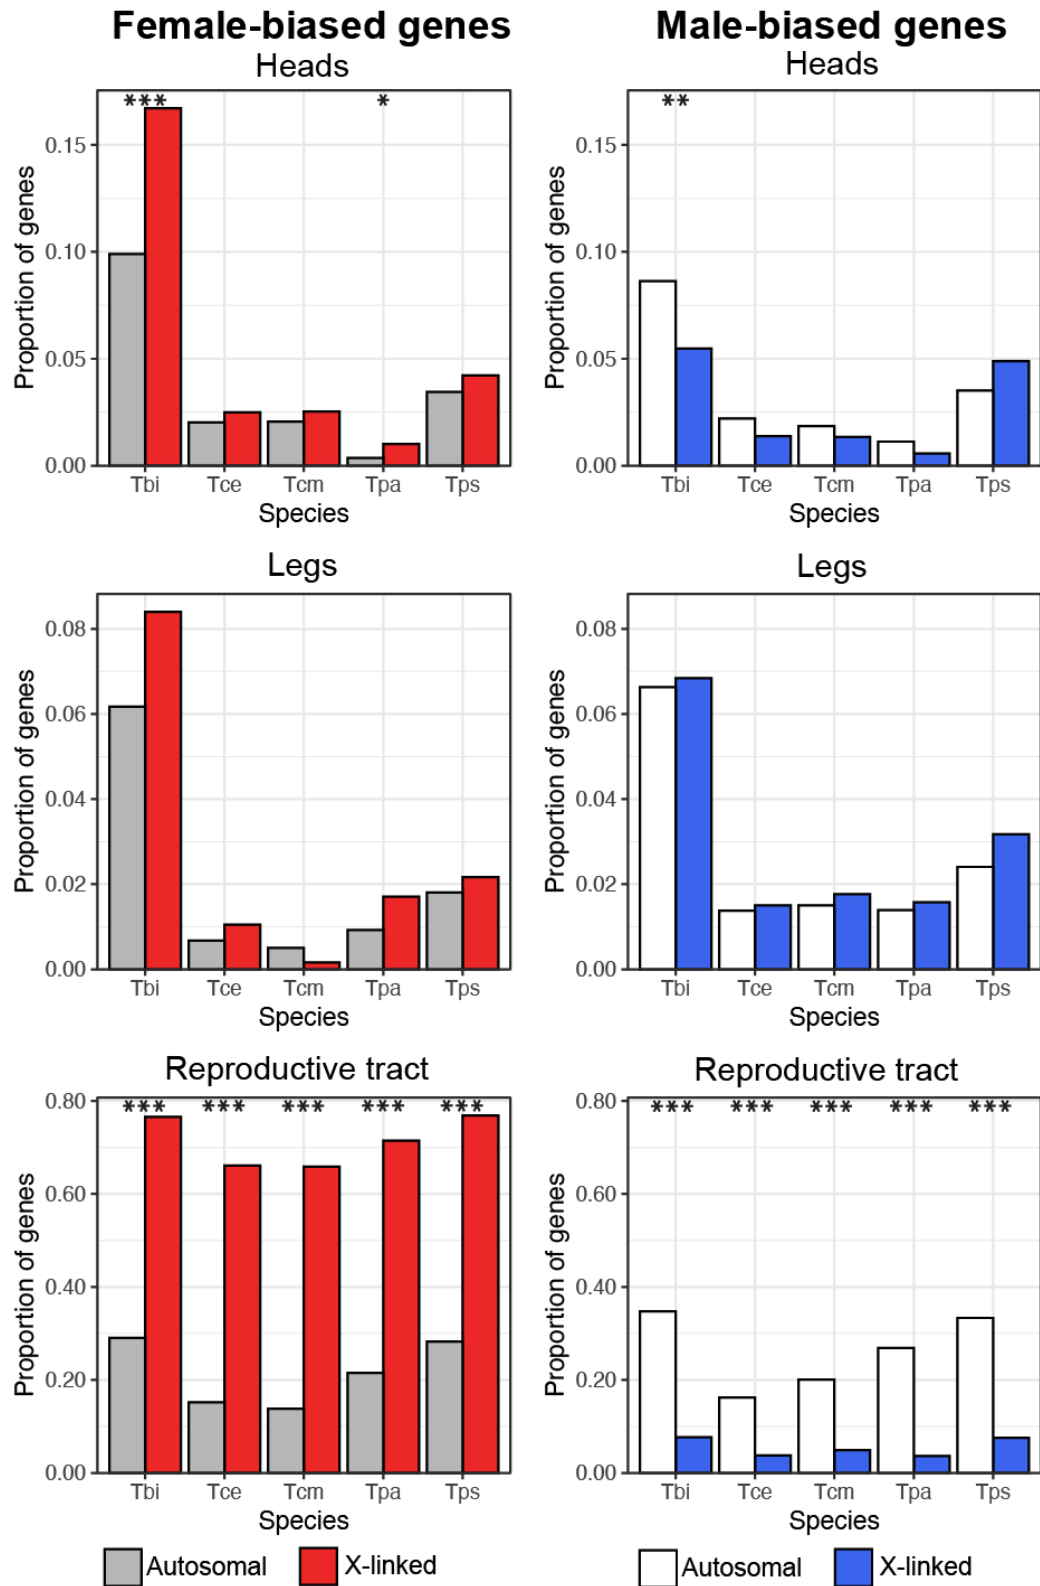

317

318

319 **Fig. 6 | Proportion of female- and male-biased genes on the X and autosomes in**

320 **reproductive tract, head and leg samples.** Note the scale changes between tissue-types.

321 Asterisks indicate the significance level (FDR) of Fisher's exact tests (\*\*<math><0.001</math>, \*\*<math><0.01</math>,

322 \*<math><0.05</math>). Species names are abbreviated as Tbi = *T. bartmani*, Tce = *T. cristinae*, Tcm = *T. californicum*, Tps = *T. poppensis*, and Tpa = *T. podura*.

## 323 Discussion

324

325 The difference in copy numbers of the X chromosome in males and females is expected to  
326 have profound effects on its evolution. In particular, the X chromosome is predicted to evolve  
327 at a faster rate due to a combination of hemizygous selection and increased drift (Wright 1931;  
328 Charlesworth et al. 1987; Vicoso and Charlesworth 2009), to accumulate sexually antagonistic  
329 alleles (Rice 1984; Gibson et al. 2002), and to evolve dosage compensation mechanisms  
330 (Disteche 2012; Mank 2013; Gu and Walters 2017; Lenormand et al. 2020). Support for these  
331 predictions has been mixed from the taxa examined so far, yet the factors responsible for the  
332 variation among different taxa are poorly understood (Bachtrog et al. 2011; Gu and Walters  
333 2017). In this study, we examine these predictions across five species of *Timema* stick insects.  
334 Overall, we find evidence for a faster-X effect and complete dosage compensation in somatic  
335 tissues, but little evidence for the accumulation of sexually antagonistic alleles on the X.  
336 Patterns of X chromosome evolution were generally consistent across *Timema* species,  
337 suggesting that the factors influencing sex chromosome evolution in this group are also largely  
338 the same.

339

340 Sex chromosome conservation is highly variable between taxa, with extensive turnover  
341 between species in some groups, e.g. beetles (Coleoptera) (Blackmon and Demuth 2014),  
342 flies (Diptera) (Vicoso and Bachtrog 2015), or frogs (Ranidae) (Jeffries et al. 2018), and  
343 conservation for over a hundred million years in others, e.g. Eutherian mammals (Lahn and  
344 Page 1999; Cortez et al. 2014; Marshall Graves 2015), moths and butterflies (Lepidoptera)  
345 (Fraïsse et al. 2017), or birds (Shetty et al. 1999; Xu and Zhou 2020). The factors influencing  
346 turnover rate are complex and interacting (Vicoso 2019), however, one key factor is the level  
347 of differentiation between the X and Y chromosomes, with more differentiated chromosomes  
348 less likely to turnover (Pokorná and Kratochvíl 2009; Vicoso 2019). Our finding that the X  
349 chromosome in *Timema* is old (likely conserved for over 120 million years) supports this idea.  
350 XX/X0 sex determination systems as found in *Timema* (Schwander and Crespi 2009) are  
351 thought to derive from XX/XY systems with highly differentiated X and Y chromosomes and  
352 represent the end point of the gradual loss of gene content from the Y (Bergero and  
353 Charlesworth 2009). As such, XX/X0 systems could be considered the most extreme example  
354 of sex chromosome differentiation possible, which may mean that XX/X0 systems are  
355 particularly unlikely to turnover (but see (Blackmon and Demuth 2014)).

356

357 Gene sequence evolution on the X chromosome is expected to be faster than that on the  
358 autosomes due to a combination of increased drift and hemizygous selection (Charlesworth  
359 et al. 1987; Vicoso and Charlesworth 2009). While this prediction should apply universally,  
360 support for a faster-X effect is mixed (Mank et al. 2010; Meisel and Connallon 2013;  
361 Charlesworth et al. 2018; Pinharanda et al. 2019; Whittle et al. 2020). The cause of this  
362 variation is unclear, in particular, because typically only single lineages are examined. In single  
363 lineages it is difficult to disentangle the influence of X-linkage from lineage-specific effects  
364 such as recent bottlenecks, differences in operational sex ratio, or population size. By  
365 examining the influence of X-linkage in multiple *Timema* species covering a span of 30 million  
366 years of divergence, we can assess how consistent the effects of X linkage are, allowing for a  
367 comprehensive assessment of X chromosome evolution in this genus. Using this approach,

368 we found consistent evidence for a faster X effect in all species, and that this effect is primarily  
369 driven by reduced purifying selection on the X.

370

371 The reduction of purifying selection on the X relative to the autosomes is expected to be largest  
372 when the effective population size of the X ( $N_{eX}$ ) is much smaller than that of the autosomes  
373 ( $N_{eA}$ ) (Vicoso and Charlesworth 2009). The neutral expectation in a population with a  
374 balanced sex ratio is that the ratio of  $N_{eX}$  to  $N_{eA}$  will be approximately 0.75 (Wright 1969; Hartl  
375 and Clark 2006), however, demographic and selective processes can have a large effect on  
376 this ratio (Nunney 1993; Caballero 1995; Charlesworth 2001). In *Timema*,  $N_{eX} / N_{eA}$  values  
377 are much smaller than 0.75 (0.19 to 0.48, estimated from nucleotide diversity), meaning the  
378 effective population size of the X is much smaller than that of the autosomes. Departures from  
379 the expected 0.75 nucleotide diversity ratio are common across animals and are typically  
380 thought to be a consequence of sex-biased demography (Mank et al. 2010). In male  
381 heterogametic species such as *Timema*, increased reproductive skew for males (for example  
382 under harem-like mating systems) will disproportionately reduce diversity on the autosomes.  
383 This would result in an X to autosome nucleotide diversity ratio  $> 0.75$ . Here we observe the  
384 opposite pattern, a reduction in the autosome nucleotide diversity ratio. As such it is likely that  
385 the reduced diversity on the X is not due to demography but perhaps due to reduced  
386 recombination rates on the X relative to the autosomes, and/or to selective differences on the  
387 X. In particular, the X chromosome is likely to be susceptible to an increased frequency of  
388 selective sweeps / background selection which will disproportionately reduce genetic diversity  
389 on the X (Betancourt et al. 2004; Charlesworth 2012; Charlesworth 2013; Wilson Sayres  
390 2018).

391

392 Independently of the mechanisms responsible for the strongly reduced effective population  
393 size of the X in *Timema*, it supports our interpretation that the faster-X effect is driven by less  
394 effective purifying selection. Most previous studies of the faster-X effect have focused on  
395 species with  $N_{eX} / N_{eA}$  values  $\geq 0.75$  (Mank et al. 2010), making direct comparisons with our  
396 study difficult. The exceptions to this are studies on birds and *Heliconius* butterflies which have  
397 values of  $N_{eZ} / N_{eA}$  in a similar range as *Timema*. Note that both these taxa have  
398 heterogametic females (ZW), where low  $N_{eZ} / N_{eA}$  ratios are believed to stem from strong  
399 reproductive skew among males (Vicoso and Charlesworth 2009; Mank et al. 2010). In birds,  
400 a faster-Z (faster-X) effect is commonly observed and appears to be driven primarily by less  
401 effective purifying selection (Mank et al. 2010). In contrast, in *Heliconius* evidence for a faster-  
402 Z effect is weaker and is thought to be driven by increased levels of adaptive evolution on the  
403 Z, with no evidence for reduced purifying selection on the Z (Pinharanda et al. 2019). The  
404 cause of this difference is unclear. However, it has been suggested that it may be due to the  
405 overall higher effective population size in *Heliconius* ( $N_e \approx 2,000,000$  (Keightley et al. 2015))  
406 compared to birds ( $N_e = 200,000 - 600,000$  (Primmer et al. 2002; Axelsson et al. 2004;  
407 Jennings and Edwards 2005; Backström et al. 2008)), meaning that selection can be efficient  
408 in *Heliconius* even with the relatively reduced effective population size of the sex chromosome  
409 (Mank et al. 2010; Pinharanda et al. 2019). This interpretation conflicts with our findings in  
410 *Timema*, as the (autosomal) effective population size varies greatly between species (from  
411  $\sim 150,000$  in *T. poppensis* to  $\sim 2,000,000$  in *T. podura*), yet we observe a similar reduction in  
412 purifying selection on the X in all species. The reason for this variation between study systems  
413 is thus unclear, and highlights the need for future studies across diverse taxa.

414

415 The X chromosome has long been predicted to be a hotspot for sexually antagonistic variation  
416 (Rice 1984; Gibson et al. 2002). The evolution of sex-biased gene expression is thought to be  
417 driven by sexually antagonistic selection, and thus sex-biased gene expression should be  
418 overrepresented on the X chromosome ((Ellegren and Parsch 2007; Innocenti and Morrow  
419 2010; Griffin et al. 2013) but see (Hitchcock and Gardner 2020; Ruzicka and Connallon 2020)).  
420 In *Timema*, we find very little support for this prediction with only a small enrichment of sex-  
421 biased genes on the X in one of our five species. In combination with studies in *Drosophila*  
422 *melanogaster* (Ruzicka et al. 2019), *Callosobruchus maculatus* (Sayadi et al. 2019), and  
423 *Ischnura elegans* (Chauhan et al. 2021) which also found little or no enrichment of sexually  
424 antagonistic alleles or sex-biased gene expression on the sex chromosomes, our study  
425 suggests that the advantage of accumulating sexually antagonistic alleles on the X be may be  
426 smaller than often assumed. The reasons for this are unclear. However, it is likely that the  
427 advantage X-linkage gives to sexually antagonistic alleles is balanced by other forces such as  
428 epistatic interactions (Arnqvist et al. 2014) or sex-specific dominance (Fry 2010). Both forces  
429 favour the accumulation of sexually antagonistic alleles on the autosomes. Despite this,  
430 several studies do show the expected enrichment of sexually antagonistic alleles or sex-  
431 biased gene expression on the X: in *Tribolium castaneum* (Whittle et al. 2020), Diptera  
432 (Innocenti and Morrow 2010; Vicoso and Bachtrog 2015), Hemiptera (Pal and Vicoso 2015),  
433 and nematodes (Albritton et al. 2014). A key challenge for future work will thus be to integrate  
434 studies that quantify multiple factors that influence the accumulation of sexually antagonistic  
435 alleles (e.g. epistatic interactions, sex-specific dominance, reproductive skew, etc.) to  
436 understand how the variation between studies and taxa is produced.

437  
438 In many species dosage compensation is thought to be important for ameliorating the costs of  
439 misexpression of genes on the X chromosome (Marín et al. 2000). Although common, there  
440 is a great deal of variation in the extent to which genes are dosage compensated. Here we  
441 find almost complete dosage compensation in the somatic tissues of all five *Timema* species,  
442 as reported for other species with X0 systems (e.g. Nematodes (Meyer 2000) and crickets  
443 (Rayner et al. 2021)). Dosage compensation is expected for X0 systems as they are thought  
444 to arise from XY systems where the Y chromosome has degraded to the point it can be lost  
445 without a large decrease in fitness. By this stage, most genes on the X should already be  
446 haplo-sufficient in males. In addition, the evolution of dosage compensation could itself hasten  
447 the loss of the Y chromosome, as genes that have functional copies on both the X and the Y  
448 will be misexpressed if chromosome-wide dosage compensation evolves (Vicoso and  
449 Bachtrog 2009; Lenormand and Roze 2021).

450  
451 In contrast to the somatic tissues, male reproductive tracts displayed a lack of dosage  
452 compensation. Reduced expression of X chromosome in male reproductive tissue has been  
453 observed in a number of species including mammals (Khil et al. 2004; Disteche 2012; Sangrithi  
454 and Turner 2018), *C. elegans* (Kelly et al. 2002; Pirrotta 2002) and insects such as *D.*  
455 *melanogaster* (Oliver 2002; Meiklejohn et al. 2011; Mahadevaraju et al. 2021) or *Teleogryllus*  
456 *oceanicus* (Rayner et al. 2021). Whether reduced X expression in male reproductive tracts  
457 generally stems from a lack of dosage compensation is, however, not clear. Indeed, reduced  
458 X expression can be caused by several non-mutually exclusive mechanisms, including the  
459 accumulation of female-biased genes on the X (Mank 2009), the movement of male-beneficial  
460 genes to the autosomes (Vibrantovski et al. 2009), or the inactivation of X chromosomes in the  
461 germ line (Lee 2005; Vibrantovski 2014). In *Timema*, we suggest an absence of dosage  
462 compensation is the most likely explanation as expression of X-linked genes in the male



463 reproductive tracts show a major peak of genes with expression approximately half of that  
464 observed in females, similar to that observed in species that lack dosage compensation (Mank  
465 and Ellegren 2009; Vicoso et al. 2013). It should be noted, however, that the expression  
466 reduction we see on the male X in *Timema* is actually slightly less than the half we would  
467 expect from a lack of dosage compensation alone. This suggests that other factors, described  
468 above, may also have an influence. Disentangling the contribution of each of these factors will  
469 require further work. Our work, however, clearly shows that expression in reproductive tissues  
470 behaves differently than in somatic tissues, highlighting the importance of studying these  
471 tissues separately particularly when assessing the extent of dosage compensation (Gu and  
472 Walters 2017).

473

474 Dosage compensation in *Timema* somatic tissues appears to be achieved by the upregulation  
475 of the X in males (type I, (Gu and Walters 2017)) as indicated by similar expression levels of  
476 genes on the X and the autosomes in both sexes. This interpretation assumes that the  
477 ancestral state of X chromosome expression (before it was a sex chromosome) was similar to  
478 the other autosomes. This seems likely as expression across all *Timema* autosomes is similar.  
479 However, assessing the ancestral state of X expression is largely impossible as the *Timema*  
480 X chromosome appears to be very old (~120 million years). As a consequence, there are likely  
481 no species available for comparison with conserved genome organisation but with X  
482 chromosomes that are homologous to different *Timema* autosomes. Similar to *Timema*,  
483 upregulation of the X chromosome in males also appears to be the mechanism for dosage  
484 compensation in all other XX/XY or XX/X0 insect systems yet studied, even when dosage  
485 compensation is incomplete (Gu and Walters 2017). With our study, this amounts to  
486 information from seven different insect orders (Odonata (Chauhan et al. 2021), Phasmatodea  
487 (this study), Hemiptera (Pal and Vicoso 2015; Richard et al. 2017), Orthoptera (Rayner et al.  
488 2021), Strepsiptera (Mahajan and Bachtrog 2015), Coleoptera (Prince et al. 2010; Mahajan  
489 and Bachtrog 2015), and Diptera (Bone and Kuroda 1996; Marín et al. 1996; Deng et al. 2011;  
490 Nozawa et al. 2014; Jiang et al. 2015; Vicoso and Bachtrog 2015; Rose et al. 2016))  
491 suggesting that this mechanism may be universal for insect species with heterogametic males.

492

## 493 **Conclusions**

494

495 How consistent the consequences of sex linkage are for gene sequence and expression  
496 evolution across taxa remains an open question. Here we examine several key aspects of sex  
497 chromosome evolution in a previously neglected group, phasmids. Overall, we find evidence  
498 for several predicted consequences, including complete dosage compensation of the X (in  
499 somatic tissues) and a faster rate of evolution of X-linked than autosomal genes. By contrast,  
500 we find little evidence that sex linkage facilitates the accumulation of sexually antagonistic  
501 alleles. While our results were consistent across different *Timema* species, they also show  
502 key differences from studies in other taxa, highlighting the importance of studying sex  
503 chromosome evolution across a diverse set of species to distinguish general patterns caused  
504 by sex linkage from species-specific idiosyncrasies.

## 505 Methods

### 506 Sample collection and sequencing

507

508 We used a combination of available genomic data from females in addition to newly collected  
509 data for males. Reads from five females per species were downloaded from NCBI (Bioproject  
510 accession number: PRJNA670663). We collected four males from each of the five species  
511 from natural populations in California, from the same (or a geographically very close)  
512 population as the available females (Table S8). DNA extractions were done on whole-body  
513 adult males using the Qiagen Mag Attract HMW DNA kit following the manufacturer  
514 instructions. Sequencing libraries were generated for each male using a TruSeq DNA nano  
515 prep kit (550bp insert size). Libraries were then sequenced using Illumina HiSeq 2500 at the  
516 Lausanne Genomic Technologies Facility.

### 517 Using coverage to identify X-linked scaffolds

518

519 Reads were trimmed before mapping using Trimmomatic (v. 0.36) (Bolger et al. 2014) to  
520 remove adapter and low-quality sequences (options: ILLUMINACLIP:3:25:6 LEADING:9  
521 TRAILING:9 SLIDINGWINDOW:4:15 MINLEN:90). Reads from each individual were mapped  
522 to their species' reference genome (Jaron et al. 2021) (Bioproject accession number:  
523 PRJEB31411) using BWA-MEM (v. 0.7.15) (Li 2013). Multi-mapping and poor quality  
524 alignments were filtered (removing reads with XA:Z or SA:Z tags or a mapq < 30). PCR  
525 duplicates were removed with Picard (v. 2.9.0) (<http://broadinstitute.github.io/picard/>).  
526 Coverage was then estimated for all scaffolds at least 1000 bp in length using BEDTools (v.  
527 2.26.0) (Quinlan and Hall 2010). Per base coverage distributions were inspected visually for  
528 each individual and libraries with extremely non-normal coverage distributions were excluded  
529 from further analysis (Fig S1-S5) .

530

531 To compare coverage between males and females, coverage was first summed for all male  
532 and all female libraries per scaffold (for scaffolds at least 1000 bp in length). Male and female  
533 coverage was then normalised by modal coverage to adjust for differences in overall coverage.  
534 X-linked scaffolds were then identified using the  $\log_2$  ratio of male to female coverage.  
535 Autosomal scaffolds should have equal coverage in males and females ( $\log_2$  ratio of male to  
536 female coverage  $\approx 0$ ) and X-linked scaffolds should have half the coverage in males as in  
537 females ( $\log_2$  ratio of male to female coverage  $\approx -1$ ). Each species showed frequency peaks  
538 near these values (Fig S6). X linked scaffolds were classified in two ways: a 'liberal'  
539 classification (following (Vicoso and Bachtrog 2015)) whereby scaffolds were classified as X-  
540 linked if the  $\log_2$  ratio of male to female coverage < autosomal peak - 0.5, and a 'stringent'  
541 classification (following (Pal and Vicoso 2015)) whereby scaffolds were classified as X-linked  
542 if the  $\log_2$  ratio of male to female coverage was within 0.1 of the value of the X-linked peak.

543

544 To compare X-linked scaffolds between species, we examined the overlap of one-to-one  
545 orthologs (previously identified in (Jaron et al. 2021)) on the X-linked scaffolds. To determine  
546 if the overlap of X-linked orthologs between species was greater than expected, we used the  
547 SuperExactTest package (v. 0.99.4) (Wang et al. 2015) in R (R Core Team 2017). Additionally,

548 we used a tblastn approach to identify which regions of the *Bacillus rossius* genome  
549 correspond to the 210 shared X linked orthologs in *Timema* (minimum e-value =  $1 \times 10^{-20}$ ,  
550 minimum query coverage = 50%).  
551

## 552 Heterozygosity, nucleotide diversity, effective population size

553  
554 To calculate heterozygosity, reads were mapped to the reference genomes as described  
555 above. We then additionally performed indel realignment with GATK (v. 3.7) (Van der Auwera  
556 et al. 2013). A maximum-likelihood estimate of the number of heterozygous sites per scaffold  
557 was then calculated using AngsD (v. 0.921) (Korneliussen et al. 2014) (options: -doSaf 1 -gl 1  
558 -minQ 20 -minMapQ 40 -fold 1 -doCounts 1, with a minimum depth of 5 and a maximum depth  
559 of twice the median genome coverage once sites with 0 coverage were excluded) for each  
560 sample (for all scaffolds at least 1000 bp in length). The proportion of heterozygous sites was  
561 then calculated for each scaffold and the median proportion of heterozygous sites was  
562 weighted by the number of covered sites on a scaffold. A similar approach was used to  
563 calculate pairwise nucleotide diversity for each species, but using only female samples  
564 (options: -doSaf 1 -gl 1 -minQ 20 -minMapQ 40 -fold 1 -doCounts 1 with a minimum depth of  
565 5 and a maximum depth of twice the median genome coverage once sites with 0 coverage  
566 were excluded). The number of individuals (-nind) and the minimum number of individuals a  
567 site must be present in (-minind) were both set to the number of samples analysed. Effective  
568 population size was estimated for the X and autosomes using the estimates of nucleotide  
569 diversity, assuming that nucleotide diversity is equal to  $4N_e\mu$ . Estimates of the mutation rate  
570 ( $\mu$ ) were taken from *Drosophila melanogaster* ( $2.8 \times 10^{-9}$ ) (Keightley et al. 2014) and  
571 *Heliconius melpomene* ( $2.9 \times 10^{-9}$ ) (Keightley et al. 2015).

## 572 Selection analyses

573  
574 We took values of dN/dS for each species branch from Jaron et al (2021). Briefly, branch-site  
575 models with rate variation at the DNA level (Davydov et al., 2019) were run using the Godon  
576 software (<https://bitbucket.org/Davydov/godon/>, version 2020-02-17, option BSG --ncat 4) for  
577 each gene with an ortholog found in at least three of the species of *Timema* used here. Godon  
578 estimates the proportion of sites evolving under purifying selection (p0), neutrality (p1), and  
579 positive selection. We used only sites evolving under purifying or neutrality to calculate dN/dS.  
580 To test for differences in sequence divergence rates (dN/dS) between the X and autosomes,  
581 we used Wilcoxon tests with p-values adjusted for multiple comparisons using Benjamini and  
582 Hochberg's algorithm (Benjamini and Hochberg 1995). Using the same method, Jaron et al  
583 (2021) also identified branches with evidence for positively selected sites. We determined if  
584 these were overrepresented on the X using a Fisher's exact test.

## 585 Gene expression analyses

586  
587 RNA-seq reads from three composite tissues (heads, legs and reproductive tracts) for males  
588 and females (3 replicates per sex) for each of the five species are publically available (Parker  
589 et al. 2019a; Parker et al. 2019b) (Bioproject accession number: PRJNA392384). Adapter  
590 sequences were removed using Cutadapt (v. 2.3) (Martin 2011) before quality trimming reads

591 with Trimmomatic (v. 0.36) (Bolger et al. 2014) (options: LEADING:10 TRAILING:10  
592 SLIDINGWINDOW:4:20 MINLEN:80). Trimmed reads were then mapped to reference  
593 genomes using STAR (v. 2.6.0c, default options). HTSeq v.0.9.1 (Anders et al. 2015) was  
594 used to count the number of reads uniquely mapped to the exons of each gene, with the  
595 following options (htseq-count --order=name --type=exon --idattr=gene\_id --  
596 stranded=reverse). Expression analyses were performed using the Bioconductor package  
597 EdgeR (v 3.32.1) (Robinson et al. 2010), and done separately for each species and tissue.  
598 Normalisation factors for each library were computed using the TMM method and were used  
599 to calculate normalised expression levels (either FPKM or TPM). For the main analyses, genes  
600 with low expression (less than 2 FPKM (or TPM) in 2 or more libraries per sex) were excluded.  
601 This filtering step was used to exclude any sex-specifically expressed genes as our goal was  
602 to examine how the expression of genes differs in males and females. This decision could  
603 influence our results if sex-limited gene expression was extensive on the X chromosome. To  
604 investigate this we repeated our analysis with the inclusion of sex-limited genes and found  
605 similar results to the main analyses (Fig. S42 - S43). To examine dosage compensation, we  
606 used the  $\log_2$  ratio of mean male expression level to female expression level and used  
607 Wilcoxon tests (adjusted for multiple testing using Benjamini and Hochberg's algorithm  
608 (Benjamini and Hochberg 1995)) to determine if this ratio differed between genes on the  
609 autosomal and X-linked scaffolds.

610  
611 To determine the significance of sex on gene expression, we fit a generalised linear model  
612 (GLM) with a negative binomial distribution with sex as an explanatory variable and used a  
613 GLM likelihood ratio test to determine the significance for each gene. P-values were then  
614 corrected for multiple tests using Benjamini and Hochberg's algorithm (Benjamini and  
615 Hochberg 1995). In the main analysis sex-biased genes were then defined as genes that  
616 showed difference in expression between males and females with an FDR < 0.05 (we also  
617 repeated analyses with the additional condition that genes must show a greater than two fold  
618 difference in expression to ensure our results are robust to the effects of sex-biased allometry  
619 (Montgomery and Mank 2016)). Note that all genes not classified as sex-biased were  
620 classified as unbiased genes. We then examined if male- or female- biased genes were under-  
621 or over- represented on autosomal or X-linked scaffolds using Fisher's exact tests (adjusted  
622 for multiple-testing using Benjamini and Hochberg's algorithm (Benjamini and Hochberg  
623 1995)). To examine species by sex interactions in gene expression, we used a similar similar  
624 GLM approach as above, with sex, species, and species by sex interaction as explanatory  
625 variables for genes with an ortholog in each species. Genes with an FDR < 0.1 for the  
626 interaction term were considered to have significant species by sex interaction. To determine  
627 if sex-biased genes on the X were underrepresented for species by sex interactions, we used  
628 a Fisher's exact test.

629  
630 It is possible that dosage compensation may vary along the X chromosome. Unfortunately,  
631 our current reference genomes are too fragmented to investigate this question. Previous work  
632 by Nosil et al. (Nosil et al. 2018) however produced a more contiguous genome assembly of  
633 one of our study species, *T. cristinae*, which has been further constructed into a linkage map.  
634 To use this synteny information for each of our species, we anchored the scaffolds from each  
635 of our genome assemblies to the Nosil et al. (Nosil et al. 2018) reference genome (BioProject  
636 Accession PRJNA417530) using MUMmer (version 4.0.0beta2) (Marçais et al. 2018) with  
637 parameter --mum. The alignments were processed by other tools within the package: show-  
638 coords with parameters -THrcl to generate tab-delimited alignment files and dnadiff to

639 generate 1-to-1 alignments. We used only uniquely anchored scaffolds for which we were able  
640 to map at least 10k nucleotides to the Nosil et al. (2018) reference genome. Nosil et al (2018)  
641 indicated that linkage group 13 was the X chromosome ((Nosil et al. 2018)). To determine if  
642 this was correct, we repeated our coverage analyses on the Nosil et al. (2018) assembly. From  
643 this, we found that most scaffolds that make up linkage group 13 did not show reduced  
644 coverage in males (Fig. S44). In addition, several scaffolds from other linkage groups did show  
645 reduced coverage in males (Fig. S44). In order to use as much of the synteny information as  
646 possible we “cleaned” the Nosil et al. (2018) assembly by removing X-linked scaffolds from  
647 autosomal linkage groups 1-12. These scaffolds were then assigned to a new, unordered  
648 collection of scaffolds from the X chromosome, together with X-linked scaffolds from linkage  
649 group 13 and from those not assigned to any linkage group in Nosil et al. (2018). Scaffolds  
650 from linkage group 13 that were not X-linked were assigned to linkage group NA. We classified  
651 scaffolds in the Nosil et al. (2018) assembly as X-linked if most of a scaffold was covered by  
652 aligned scaffolds from our assembly assigned to the X rather than autosomes (i.e. if aligned  
653 scaffolds assigned as X covered more than twice as many bases as those assigned as  
654 autosomal for a particular scaffold, it was classed as X-linked).

## 655 Acknowledgements

656  
657 We would like to thank Chloe Larose, Kirsten Jalvingh, and Bart Zijlstra for their assistance in  
658 the field. This project was supported by several grants from the Swiss Science Foundation:  
659 PP00P3\_170627 and 31003A\_182495 to TS as well as CRSII3\_160723 to TS, MRR and  
660 Nicolas Galtier. We would like to thank the former Vital-IT platform of the SIB Swiss Institute  
661 of Bioinformatics (SIB) and the DCSR for maintaining the computer infrastructure at the  
662 University of Lausanne.

## 663 Data and code availability

664 Raw sequence reads have been deposited in NCBI’s sequence read archive under the  
665 bioproject: PRJNA725673 (Table S8). Scripts for the analyses in this paper are available at:  
666 [https://github.com/DarrenJParker/Timema\\_sex\\_chr\\_evol\\_code](https://github.com/DarrenJParker/Timema_sex_chr_evol_code) and will be archived at  
667 Zenodo upon acceptance. Data was processed to generate plots and statistics using R v4.0.3  
668 and Python v.3.7.3 unless otherwise stated.

## 669 References

- 670 Albritton SE, Kranz A-L, Rao P, Kramer M, Dieterich C, Ercan S. 2014. Sex-biased gene  
671 expression and evolution of the x chromosome in nematodes. *Genetics* 197:865–883.
- 672 Anders S, Pyl PT, Huber W. 2015. HTSeq—a Python framework to work with high-throughput  
673 sequencing data. *Bioinformatics* 31:166–169.
- 674 Arnqvist G, Vellnow N, Rowe L. 2014. The effect of epistasis on sexually antagonistic genetic  
675 variation. *Proceedings of the Royal Society B: Biological Sciences* 281:20140489.
- 676 Axelsson E, Smith NGC, Sundström H, Berlin S, Ellegren H. 2004. Male-biased mutation rate  
677 and divergence in autosomal, Z-linked and W-linked introns of chicken and turkey. *Mol.*  
678 *Biol. Evol.* 21:1538–1547.
- 679 Bachtrog D, Kirkpatrick M, Mank JE, McDaniel SF, Pires JC, Rice W, Valenzuela N. 2011. Are  
680 all sex chromosomes created equal? *Trends Genet.* 27:350–357.
- 681 Backström N, Fagerberg S, Ellegren H. 2008. Genomics of natural bird populations: a gene-  
682 based set of reference markers evenly spread across the avian genome. *Mol. Ecol.*  
683 17:964–980.
- 684 Benjamini Y, Hochberg Y. 1995. Controlling the false discovery rate: A practical and powerful  
685 approach to multiple testing. *J. R. Stat. Soc. Series B Stat. Methodol.* 57:289–300.
- 686 Bergero R, Charlesworth D. 2009. The evolution of restricted recombination in sex  
687 chromosomes. *Trends Ecol. Evol.* 24:94–102.
- 688 Betancourt AJ, Kim Y, Orr HA. 2004. A pseudohitchhiking model of X vs. autosomal diversity.  
689 *Genetics* 168:2261–2269.
- 690 Birchler JA. 2016. Parallel universes for models of X chromosome dosage compensation in  
691 *Drosophila*: a review. *Cytogenet. Genome Res.* 148:52–67.
- 692 Birchler JA, Veitia RA. 2012. Gene balance hypothesis: connecting issues of dosage  
693 sensitivity across biological disciplines. *Proc. Natl. Acad. Sci. U. S. A.* 109:14746–14753.
- 694 Blackmon H, Demuth JP. 2014. Estimating tempo and mode of Y chromosome turnover:  
695 explaining Y chromosome loss with the fragile Y hypothesis. *Genetics* 197:561–572.
- 696 Bolger AM, Lohse M, Usadel B. 2014. Trimmomatic: a flexible trimmer for Illumina sequence  
697 data. *Bioinformatics* 30:2114–2120.
- 698 Bone JR, Kuroda MI. 1996. Dosage compensation regulatory proteins and the evolution of  
699 sex chromosomes in *Drosophila*. *Genetics* 144:705–713.
- 700 Bradler S, Buckley TR. 2018. Biodiversity of Phasmatodea. In: *Insect Biodiversity*. Chichester,  
701 UK: John Wiley & Sons, Ltd. p. 281–313.
- 702 Caballero A. 1995. On the effective size of populations with separate sexes, with particular  
703 reference to sex-linked genes. *Genetics* 139:1007–1011.
- 704 Charlesworth B. 1978. Model for evolution of Y chromosomes and dosage compensation.  
705 *Proc. Natl. Acad. Sci. U. S. A.* 75:5618–5622.
- 706 Charlesworth B. 1996. The evolution of chromosomal sex determination and dosage

- 707            compensation. *Curr. Biol.* 6:149–162.
- 708    Charlesworth B. 2001. The effect of life-history and mode of inheritance on neutral genetic  
709            variability. *Genet. Res.* 77:153–166.
- 710    Charlesworth B. 2012. The role of background selection in shaping patterns of molecular  
711            evolution and variation: evidence from variability on the *Drosophila* X chromosome.  
712            *Genetics* 191:233–246.
- 713    Charlesworth B. 2013. Background selection 20 years on: the Wilhelmine E. Key 2012  
714            invitational lecture. *J. Hered.* 104:161–171.
- 715    Charlesworth B, Campos JL, Jackson BC. 2018. Faster-X evolution: Theory and evidence  
716            from *Drosophila*. *Mol. Ecol.* 27:3753–3771.
- 717    Charlesworth B, Coyne JA, Barton NH. 1987. The relative rates of evolution of sex  
718            chromosomes and autosomes. *Am. Nat.* 130:113–146.
- 719    Chauhan P, Swaegers J, Guillen RAS, Svensson EI, Wellenreuther M, Hansson B. 2021.  
720            Genome assembly, sex-biased gene expression and dosage compensation in the  
721            damselfly *Ischnura elegans*. *Genomics* 113:1828–1837.
- 722    Conrad T, Akhtar A. 2012. Dosage compensation in *Drosophila melanogaster*: epigenetic fine-  
723            tuning of chromosome-wide transcription. *Nat. Rev. Genet.* 13:123–134.
- 724    Cortez D, Marin R, Toledo-Flores D, Froidevaux L, Liechti A, Waters PD, Grützner F,  
725            Kaessmann H. 2014. Origins and functional evolution of Y chromosomes across  
726            mammals. *Nature* 508:488–493.
- 727    Coyne JA, Orr HA. 2004. Speciation. Sunderland, USA: Sinauer Associates
- 728    Deng X, Hiatt JB, Nguyen DK, Ercan S, Sturgill D, Hillier LW, Schlesinger F, Davis CA, Reinke  
729            VJ, Gingeras TR, et al. 2011. Evidence for compensatory upregulation of expressed X-  
730            linked genes in mammals, *Caenorhabditis elegans* and *Drosophila melanogaster*. *Nat.*  
731            *Genet.* 43:1179–1185.
- 732    Disteche CM. 2012. Dosage compensation of the sex chromosomes. *Annu. Rev. Genet.*  
733            46:537–560.
- 734    Ellegren H, Parsch J. 2007. The evolution of sex-biased genes and sex-biased gene  
735            expression. *Nat. Rev. Genet.* 8:689–698.
- 736    Fraïsse C, Picard MAL, Vicoso B. 2017. The deep conservation of the Lepidoptera Z  
737            chromosome suggests a non-canonical origin of the W. *Nat. Commun.* 8:1–9.
- 738    Fry JD. 2010. The genomic location of sexually antagonistic variation: some cautionary  
739            comments. *Evolution* 64:1510–1516.
- 740    Gibson JR, Chippindale AK, Rice WR. 2002. The X chromosome is a hot spot for sexually  
741            antagonistic fitness variation. *Proc. Biol. Sci.* 269:499–505.
- 742    Griffin RM, Dean R, Grace JL, Rydén P, Friberg U. 2013. The shared genome is a pervasive  
743            constraint on the evolution of sex-biased gene expression. *Mol. Biol. Evol.* 30:2168–2176.
- 744    Gu L, Walters JR. 2017. Evolution of sex chromosome dosage compensation in animals: a  
745            beautiful theory, undermined by facts and bedeviled by details. *Genome Biol. Evol.*  
746            9:2461–2476.

- 747 Harrison PW, Wright AE, Zimmer F, Dean R, Montgomery SH, Pointer MA, Mank JE. 2015.  
748 Sexual selection drives evolution and rapid turnover of male gene expression. *Proc. Natl.*  
749 *Acad. Sci. U. S. A.* 112:4393–4398.
- 750 Hartl DL, Clark AG. 2006. Principles of Population Genetics. 4th ed. Sinauer Associates
- 751 Hitchcock TJ, Gardner A. 2020. A gene's-eye view of sexual antagonism. *Proc. Biol. Sci.*  
752 287:20201633.
- 753 Innocenti P, Morrow EH. 2010. The sexually antagonistic genes of *Drosophila melanogaster*.  
754 *PLoS Biol.* 8:e1000335.
- 755 Jaquiéry J, Simon J-C, Robin S, Richard G, Peccoud J, Boulain H, Legeai F, Tanguy S,  
756 Prunier-Leterme N, Le Trionnaire G. 2021. Masculinization of the X-chromosome in aphid  
757 soma and gonads. *bioRxiv*:2021.08.13.453080.
- 758 Jaron KS, Parker DJ, Anselmetti Y, Van PT, Bast J, Dumas Z, Figuet E, François CM, Hayward  
759 K, Rossier V, et al. 2021. Convergent consequences of parthenogenesis on stick insect  
760 genomes. *bioRxiv*:2020.11.20.391540.
- 761 Jeffries DL, Lavanchy G, Sermier R, Sredl MJ, Miura I, Borzée A, Barrow LN, Canestrelli D,  
762 Crochet P-A, Dufresnes C, et al. 2018. A rapid rate of sex-chromosome turnover and non-  
763 random transitions in true frogs. *Nat. Commun.* 9:4088.
- 764 Jennings WB, Edwards SV. 2005. Speciation history of Australian grass finches (*Poephila*)  
765 inferred from thirty gene trees. *Evolution* 59:2033–2047.
- 766 Jiang X, Biedler JK, Qi Y, Hall AB, Tu Z. 2015. Complete dosage compensation in *Anopheles*  
767 *stephensi* and the evolution of sex-biased genes in mosquitoes. *Genome Biol. Evol.*  
768 7:1914–1924.
- 769 Keightley PD, Ness RW, Halligan DL, Haddrill PR. 2014. Estimation of the spontaneous  
770 mutation rate per nucleotide site in a *Drosophila melanogaster* full-sib family. *Genetics*  
771 196:313–320.
- 772 Keightley PD, Pinharanda A, Ness RW, Simpson F, Dasmahapatra KK, Mallet J, Davey JW,  
773 Jiggins CD. 2015. Estimation of the spontaneous mutation rate in *Heliconius melpomene*.  
774 *Mol. Biol. Evol.* 32:239–243.
- 775 Kelly WG, Schaner CE, Dernburg AF, Lee M-H, Kim SK, Villeneuve AM, Reinke V. 2002. X-  
776 chromosome silencing in the germline of *C. elegans*. *Development* 129:479–492.
- 777 Khil PP, Smirnova NA, Romanienko PJ, Camerini-Otero RD. 2004. The mouse X chromosome  
778 is enriched for sex-biased genes not subject to selection by meiotic sex chromosome  
779 inactivation. *Nat. Genet.* 36:642–646.
- 780 Korneliussen TS, Albrechtsen A, Nielsen R. 2014. ANGSD: Analysis of next generation  
781 sequencing data. *BMC Bioinformatics* 15:356.
- 782 Lahn BT, Page DC. 1999. Four evolutionary strata on the human X chromosome. *Science*  
783 286:964–967.
- 784 Lee JT. 2005. Sex chromosome inactivation: the importance of pairing. *Curr. Biol.* 15:R249–  
785 R252.
- 786 Lenormand T, Fyon F, Sun E, Roze D. 2020. Sex Chromosome Degeneration by Regulatory  
787 Evolution. *Curr. Biol.* 30:3001–3006.e5.



- 788 Lenormand T, Roze D. 2021. Y recombination arrest and degeneration in the absence of  
789 sexual dimorphism. *bioRxiv*:2021.05.18.444606.
- 790 Li H. 2013. Aligning sequence reads, clone sequences and assembly contigs with BWA-MEM.  
791 *arXiv*:1303.3997.
- 792 Lucchesi JC. 1998. Dosage compensation in flies and worms: the ups and downs of X-  
793 chromosome regulation. *Curr. Opin. Genet. Dev.* 8:179–184.
- 794 Mahadevaraju S, Fear JM, Akeju M, Galletta BJ, Pinheiro MMLS, Avelino CC, Cabral-de-Mello  
795 DC, Conlon K, Dell’Orso S, Demere Z, et al. 2021. Dynamic sex chromosome expression  
796 in *Drosophila* male germ cells. *Nat. Commun.* 12:892.
- 797 Mahajan S, Bachtrog D. 2015. Partial dosage compensation in Strepsiptera, a sister group of  
798 beetles. *Genome Biol. Evol.* 7:591–600.
- 799 Mank JE. 2009. The W, X, Y and Z of sex-chromosome dosage compensation. *Trends Genet.*  
800 25:226–233.
- 801 Mank JE. 2013. Sex chromosome dosage compensation: definitely not for everyone. *Trends*  
802 *Genet.* 29:677–683.
- 803 Mank JE, Ellegren H. 2009. All dosage compensation is local: gene-by-gene regulation of sex-  
804 biased expression on the chicken Z chromosome. *Heredity* 102:312–320.
- 805 Mank JE, Hosken DJ, Wedell N. 2014. Conflict on the sex chromosomes: cause, effect, and  
806 complexity. *Cold Spring Harb. Perspect. Biol.* 6:a017715.
- 807 Mank JE, Vicoso B, Berlin S, Charlesworth B. 2010. Effective population size and the Faster-  
808 X effect: empirical results and their interpretation. *Evolution* 64:663–674.
- 809 Marçais G, Delcher AL, Phillippy AM, Coston R, Salzberg SL, Zimin A. 2018. MUMmer4: A  
810 fast and versatile genome alignment system. *PLoS Comput. Biol.* 14:e1005944.
- 811 Marín I, Franke A, Bashaw GJ, Baker BS. 1996. The dosage compensation system of  
812 *Drosophila* is co-opted by newly evolved X chromosomes. *Nature* 383:160–163.
- 813 Marín I, Siegal ML, Baker BS. 2000. The evolution of dosage-compensation mechanisms.  
814 *Bioessays* 22:1106–1114.
- 815 Marshall Graves JA. 2015. Evolution of vertebrate sex chromosomes and dosage  
816 compensation. *Nat. Rev. Genet.* 17:33–46.
- 817 Martin M. 2011. Cutadapt removes adapter sequences from high-throughput sequencing  
818 reads. *EMBnet J* 17:10–12.
- 819 Meiklejohn CD, Landeen EL, Cook JM, Kingan SB, Presgraves DC. 2011. Sex chromosome-  
820 specific regulation in the *Drosophila* male germline but little evidence for chromosomal  
821 dosage compensation or meiotic inactivation. *PLoS Biol.* 9:e1001126.
- 822 Meisel RP, Connallon T. 2013. The faster-X effect: integrating theory and data. *Trends Genet.*  
823 29:537–544.
- 824 Meyer BJ. 2000. Sex in the worm: counting and compensating X-chromosome dose. *Trends*  
825 *Genet.* 16:247–253.
- 826 Montgomery SH, Mank JE. 2016. Inferring regulatory change from gene expression: the

- 827 confounding effects of tissue scaling. *Mol. Ecol.* 25:5114–5128.
- 828 Mullon C, Pomiankowski A, Reuter M. 2012. The effects of selection and genetic drift on the  
829 genomic distribution of sexually antagonistic alleles. *Evolution* 66:3743–3753.
- 830 Mullon C, Wright AE, Reuter M, Pomiankowski A, Mank JE. 2015. Evolution of dosage  
831 compensation under sexual selection differs between X and Z chromosomes. *Nat.*  
832 *Commun.* 6:7720.
- 833 Nosil P, Villoutreix R, de Carvalho CF, Farkas TE, Soria-Carrasco V, Feder JL, Crespi BJ,  
834 Gompert Z. 2018. Natural selection and the predictability of evolution in *Timema* stick  
835 insects. *Science* 359:765–770.
- 836 Nozawa M, Fukuda N, Ikeo K, Gojobori T. 2014. Tissue- and stage-dependent dosage  
837 compensation on the neo-X chromosome in *Drosophila pseudoobscura*. *Mol. Biol. Evol.*  
838 31:614–624.
- 839 Nunney L. 1993. The influence of mating system and overlapping generations on effective  
840 population size. *Evolution* 47:1329–1341.
- 841 Ohno S. 1967. Sex chromosomes and sex-linked genes. Berlin: Springer Verlag
- 842 Oliver B. 2002. Genetic control of germline sexual dimorphism in *Drosophila*. *Int. Rev. Cytol.*  
843 219:1–60.
- 844 Pal A, Vicoso B. 2015. The X Chromosome of Hemipteran insects: conservation, dosage  
845 compensation and sex-biased expression. *Genome Biol. Evol.* 7:3259–3268.
- 846 Palmer DH, Rogers TF, Dean R, Wright AE. 2019. How to identify sex chromosomes and their  
847 turnover. *Mol. Ecol.* 28:4709–4724.
- 848 Parker DJ, Bast J, Jalvingh K, Dumas Z, Robinson-Rechavi M, Schwander T. 2019a. Sex-  
849 biased gene expression is repeatedly masculinized in asexual females. *Nat. Commun.*  
850 10:4638.
- 851 Parker DJ, Bast J, Jalvingh K, Dumas Z, Robinson-Rechavi M, Schwander T. 2019b.  
852 Repeated evolution of asexuality involves convergent gene expression changes. *Mol.*  
853 *Biol. Evol.* 36 :350–364.
- 854 Parkhurst SM, Meneely PM. 1994. Sex determination and dosage compensation: lessons  
855 from flies and worms. *Science* 264:924–932.
- 856 Parsch J, Ellegren H. 2013. The evolutionary causes and consequences of sex-biased gene  
857 expression. *Nat. Rev. Genet.* 14:83–87.
- 858 Payseur BA, Presgraves DC, Filatov DA. 2018. Introduction: Sex chromosomes and  
859 speciation. *Mol. Ecol.* 27:3745–3748.
- 860 Pinharanda A, Rousselle M, Martin SH, Hanly JJ, Davey JW, Kumar S, Galtier N, Jiggins CD.  
861 2019. Sexually dimorphic gene expression and transcriptome evolution provide mixed  
862 evidence for a fast-Z effect in *Heliconius*. *J. Evol. Biol.* 32:194–204.
- 863 Pirrotta V. 2002. Silence in the germ. *Cell* 110:661–664.
- 864 Pokorná M, Kratochvíl L. 2009. Phylogeny of sex-determining mechanisms in squamate  
865 reptiles: are sex chromosomes an evolutionary trap? *Zool. J. Linn. Soc.* 156:168–183.

- 866 Primmer CR, Borge T, Lindell J, Saetre G-P. 2002. Single-nucleotide polymorphism  
867 characterization in species with limited available sequence information: high nucleotide  
868 diversity revealed in the avian genome. *Mol. Ecol.* 11:603–612.
- 869 Prince EG, Kirkland D, Demuth JP. 2010. Hyperexpression of the X chromosome in both  
870 sexes results in extensive female bias of X-linked genes in the flour beetle. *Genome Biol.*  
871 *Evol.* 2:336–346.
- 872 Quinlan AR, Hall IM. 2010. BEDTools: a flexible suite of utilities for comparing genomic  
873 features. *Bioinformatics* 26:841–842.
- 874 Rayner JG, Hitchcock TJ, Bailey NW. 2021. Variable dosage compensation is associated with  
875 female consequences of an X-linked, male-beneficial mutation. *Proc. Biol. Sci.*  
876 288:20210355.
- 877 R Core Team. 2017. R: A Language and Environment for Statistical Computing. Available  
878 from: <https://www.R-project.org/>
- 879 Rice WR. 1984. Sex chromosomes and the evolution of sexual dimorphism. *Evolution* 38:735–  
880 742.
- 881 Richard G, Legeai F, Prunier-Leterme N, Bretaudeau A, Tagu D, Jaquiéry J, Le Trionnaire G.  
882 2017. Dosage compensation and sex-specific epigenetic landscape of the X chromosome  
883 in the pea aphid. *Epigenetics Chromatin* 10:30.
- 884 Riesch R, Muschick M, Lindtke D, Villoutreix R, Comeault AA, Farkas TE, Lucek K, Hellen E,  
885 Soria-Carrasco V, Dennis SR, et al. 2017. Transitions between phases of genomic  
886 differentiation during stick-insect speciation. *Nature Ecology & Evolution* 1:0082.
- 887 Robinson MD, McCarthy DJ, Smyth GK. 2010. edgeR: a Bioconductor package for differential  
888 expression analysis of digital gene expression data. *Bioinformatics* 26:139–140.
- 889 Rose G, Krzywinska E, Kim J, Revuelta L, Ferretti L, Krzywinski J. 2016. Dosage  
890 compensation in the African Malaria Mosquito *Anopheles gambiae*. *Genome Biol. Evol.*  
891 8:411–425.
- 892 Ruzicka F, Connallon T. 2020. Is the X chromosome a hot spot for sexually antagonistic  
893 polymorphisms? Biases in current empirical tests of classical theory. *Proceedings of the*  
894 *Royal Society B: Biological Sciences* 287:20201869.
- 895 Ruzicka F, Hill MS, Pennell TM, Flis I, Ingleby FC, Mott R, Fowler K, Morrow EH, Reuter M.  
896 2019. Genome-wide sexually antagonistic variants reveal long-standing constraints on  
897 sexual dimorphism in fruit flies. *PLoS Biol.* 17:e3000244.
- 898 Sangrithi MN, Turner JMA. 2018. Mammalian X chromosome dosage compensation:  
899 perspectives from the germ line. *Bioessays* 40:e1800024.
- 900 Sayadi A, Martinez Barrio A, Immonen E, Dainat J, Berger D, Tellgren-Roth C, Nystedt B,  
901 Arnqvist G. 2019. The genomic footprint of sexual conflict. *Nat Ecol Evol* 3:1725–1730.
- 902 Schwander T, Crespi BJ. 2009. Multiple direct transitions from sexual reproduction to  
903 apomictic parthenogenesis in *Timema* stick insects. *Evolution* 63:84–103.
- 904 Shetty S, Griffin DK, Graves JA. 1999. Comparative painting reveals strong chromosome  
905 homology over 80 million years of bird evolution. *Chromosome Res.* 7:289–295.
- 906 Simon S, Letsch H, Bank S, Buckley TR, Donath A, Liu S, Machida R, Meusemann K, Misof

- 907 B, Podsiadlowski L, et al. 2019. Old World and New World Phasmatodea: phylogenomics  
908 resolve the evolutionary history of stick and leaf Insects. *Frontiers in Ecology and*  
909 *Evolution* 7:345.
- 910 Straub T, Becker PB. 2011. Transcription modulation chromosome-wide: universal features  
911 and principles of dosage compensation in worms and flies. *Curr. Opin. Genet. Dev.*  
912 21:147–153.
- 913 Van der Auwera GA, Carneiro MO, Hartl C, Poplin R, Del Angel G, Levy-Moonshine A, Jordan  
914 T, Shakir K, Roazen D, Thibault J, et al. 2013. From FastQ data to high confidence variant  
915 calls: the Genome Analysis Toolkit best practices pipeline. *Curr. Protoc. Bioinformatics*  
916 43:11.10.1–11.10.33.
- 917 Vibranovski MD. 2014. Meiotic sex chromosome inactivation in *Drosophila*. *J Genomics*  
918 2:104–117.
- 919 Vibranovski MD, Zhang Y, Long M. 2009. General gene movement off the X chromosome in  
920 the *Drosophila* genus. *Genome Res.* 19:897–903.
- 921 Vicoso B. 2019. Molecular and evolutionary dynamics of animal sex-chromosome turnover.  
922 *Nat Ecol Evol* 3:1632–1641.
- 923 Vicoso B, Bachtrog D. 2009. Progress and prospects toward our understanding of the  
924 evolution of dosage compensation. *Chromosome Res.* 17:585–602.
- 925 Vicoso B, Bachtrog D. 2015. Numerous transitions of sex chromosomes in Diptera. *PLoS Biol.*  
926 13:e1002078.
- 927 Vicoso B, Charlesworth B. 2009. Effective population size and the faster-X effect: an extended  
928 model. *Evolution* 63:2413–2426.
- 929 Vicoso B, Emerson JJ, Zektser Y, Mahajan S, Bachtrog D. 2013. Comparative sex  
930 chromosome genomics in snakes: differentiation, evolutionary strata, and lack of global  
931 dosage compensation. *PLoS Biol.* 11:e1001643.
- 932 Wang M, Zhao Y, Zhang B. 2015. Efficient test and visualization of multi-set intersections. *Sci.*  
933 *Rep.* 5:16923.
- 934 Whittle CA, Kulkarni A, Extavour CG. 2020. Absence of a Faster-X effect in beetles (*Tribolium*,  
935 *Coleoptera*). *G3: Genes, Genomes, Genetics* 10:1125–1136.
- 936 Wilkinson GS, Breden F, Mank JE, Ritchie MG, Higginson AD, Radwan J, Jaquier J,  
937 Salzburger W, Arriero E, Barribeau SM, et al. 2015. The locus of sexual selection: moving  
938 sexual selection studies into the post-genomics era. *J. Evol. Biol.* 28:739–755.
- 939 Wilson Sayres MA. 2018. Genetic diversity on the sex chromosomes. *Genome Biol. Evol.*  
940 10:1064–1078.
- 941 Wright AE, Dean R, Zimmer F, Mank JE. 2016. How to make a sex chromosome. *Nat.*  
942 *Commun.* 7:12087.
- 943 Wright S. 1931. Evolution in Mendelian Populations. *Genetics* 16:97–159.
- 944 Wright S. 1969. Evolution and the Genetics of Populations, Volume 2: Theory of Gene  
945 Frequencies. Chicago, USA: University of Chicago Press
- 946 Xu L, Zhou Q. 2020. The female-specific W chromosomes of birds have conserved gene

- 947 contents but are not feminized. *Genes* 11:1126.
- 948 Zhang Y, Sturgill D, Parisi M, Kumar S, Oliver B. 2007. Constraint and turnover in sex-biased  
949 gene expression in the genus *Drosophila*. *Nature* 450:233–237.
- 950
- 951
